# Supplementary material for: Stable and metastable crystal structures and ammonia dynamics in strontium chloride ammines
Source: Royal Society of Chemistry journal article supplement (doi:10.1039/d3cp04114j), 2023-01-01
Supplement: d3cp04114j2.pdf [file d3cp04114j2.pdf]

# Stable and metastable crystal structures and ammonia dynamics in strontium chloride ammines

Samet Demir,<sup>†,‡</sup> Gözde İniş Demir,<sup>†</sup> Mehmet Çankaya,<sup>†</sup> and Adem Tekin<sup>\*,†,‡</sup>

<sup>†</sup>*Informatics Institute, Istanbul Technical University, 34469 Maslak, Istanbul, Türkiye*

<sup>‡</sup>*TÜBİTAK Research Institute for Fundamental Sciences, 41470 Gebze, Kocaeli, Türkiye*

E-mail: [adem.tekin@itu.edu.tr](mailto:adem.tekin@itu.edu.tr)

## List of Figures

|    |                                                                                                                                   |    |
|----|-----------------------------------------------------------------------------------------------------------------------------------|----|
| S1 | Different Sr coordinations used in the crystal structure prediction of each phase.                                                | 5  |
| S2 | Relative energy-density relationships at PBEsol-D3 level of calculations for all considered predicted crystal structures. . . . . | 6  |
| S3 | Relative energy-density relationships at PW91-D3 level of calculations for all considered predicted crystal structures. . . . .   | 7  |
| S4 | Stable octamine crystal structures found by FFCASP. . . . .                                                                       | 9  |
| S5 | Structural details of two similar octamine structure. . . . .                                                                     | 10 |
| S6 | Phonon band diagrams of octamine structures. Dotted red lines indicate the low bounds within the errorbar of 0.3 THz. . . . .     | 10 |
| S7 | Bulk diffusion NH <sub>3</sub> in SrN8Cl2.1(Exp). . . . .                                                                         | 11 |
| S8 | Stable hexamine crystal structures found by FFCASP. . . . .                                                                       | 12 |

|     |                                                                                                                                  |    |
|-----|----------------------------------------------------------------------------------------------------------------------------------|----|
| S9  | Phonon band diagrams of hexammine structures. Dotted red lines indicate the low bounds within the errorbar of 0.3 THz. . . . .   | 14 |
| S10 | Stable tetrammine crystal structures found by FFCASP. . . . .                                                                    | 15 |
| S11 | Phonon band diagrams of tetrammine structures. Dotted red lines indicate the low bounds within the errorbar of 0.3 THz. . . . .  | 17 |
| S12 | Experimental and the predicted stable diammine crystal structures found by FFCASP. . . . .                                       | 18 |
| S13 | Structural differences between SrN2Cl2_1(Exp) and SrN2Cl2_2. . . . .                                                             | 20 |
| S14 | Phonon band diagrams of diammine structures. Dotted red lines indicate the low bounds within the errorbar of 0.3 THz. . . . .    | 21 |
| S15 | Bulk diffusion of NH <sub>3</sub> in SrN2Cl2_1(Exp). . . . .                                                                     | 22 |
| S16 | Surface diffusion of NH <sub>3</sub> in SrN2Cl2_1(Exp). . . . .                                                                  | 23 |
| S17 | Bulk diffusion of NH <sub>3</sub> in SrN2Cl2_2. . . . .                                                                          | 24 |
| S18 | Stable monoammine crystal structures found by FFCASP. . . . .                                                                    | 25 |
| S19 | Phonon band diagrams of monoammine structures. Dotted red lines indicate the low bounds within the error bar of 0.3 THz. . . . . | 27 |
| S20 | Bulk diffusion of NH <sub>3</sub> in SrN1Cl2_1(Exp). . . . .                                                                     | 28 |
| S21 | Bulk diffusion of NH <sub>3</sub> in SrN1Cl2_2. . . . .                                                                          | 28 |

## List of Tables

|    |                                                                                                                                                                                                                               |   |
|----|-------------------------------------------------------------------------------------------------------------------------------------------------------------------------------------------------------------------------------|---|
| S1 | Bond distance thresholds (in Å) used for the crystal structure prediction of each phase. . . . .                                                                                                                              | 4 |
| S2 | Crystallographic details, energy ranking and density of the stable octamine structures in the energy range up to 0.5 eV/f.u. above the global minimum calculated within the PBE-D3, PBESOL-D3 and PW91-D3 levels of theory. . | 8 |

|    |                                                                                                                                                                                                                                |    |
|----|--------------------------------------------------------------------------------------------------------------------------------------------------------------------------------------------------------------------------------|----|
| S3 | Crystallographic details, energy ranking and density of the stable hexamine structures in the energy range up to 0.5 eV/f.u. above the global minimum calculated within the PBE-D3, PBESOL-D3 and PW91-D3 levels of theory. .  | 13 |
| S4 | Crystallographic details, energy ranking and density of the stable tetramine structures in the energy range up to 0.5 eV/f.u. above the global minimum calculated within the PBE-D3, PBESOL-D3 and PW91-D3 levels of theory. . | 16 |
| S5 | Crystallographic details, energy ranking and density of the stable diamine structures in the energy range up to 0.5 eV/f.u. above the global minimum calculated within the PBE-D3, PBESOL-D3 and PW91-D3 levels of theory. .   | 19 |
| S6 | Crystallographic details, energy ranking and density of the stable monoamine structures in the energy range up to 0.5 eV/f.u. above the global minimum calculated within the PBE-D3, PBESOL-D3 and PW91-D3 levels of theory. . | 26 |

Table S1: Bond distance thresholds (in Å) used for the crystal structure prediction of each phase.

| <b>Bond Distance Threshold</b> | <b>SrN1Cl2</b> | <b>SrN2Cl2</b> | <b>SrN4Cl2</b> | <b>SrN6Cl2</b> | <b>SrN8Cl2</b> |
|--------------------------------|----------------|----------------|----------------|----------------|----------------|
| Cl – Cl                        | 3.30           | 3.30           | 5.00           | 5.20           | 5.20           |
| Cl – H                         |                |                |                | 2.30           | 2.30           |
| Cl – N                         | 3.00           | 3.00           | 3.20           |                |                |
| H – H                          | 1.50           | 1.50           | 1.50           |                |                |
| N – N                          | 2.73           | 2.73           | 2.73           |                |                |
| Sr – Cl                        | 2.90           | 2.90           | 4.50           | 4.80           | 4.80           |
| Sr – H                         |                | 2.70           |                |                |                |
| Sr – N                         | 2.48           | 2.48           | 2.48           |                |                |
| Sr – Sr                        | 4.20           | 4.20           | 7.00           | 7.00           | 7.00           |



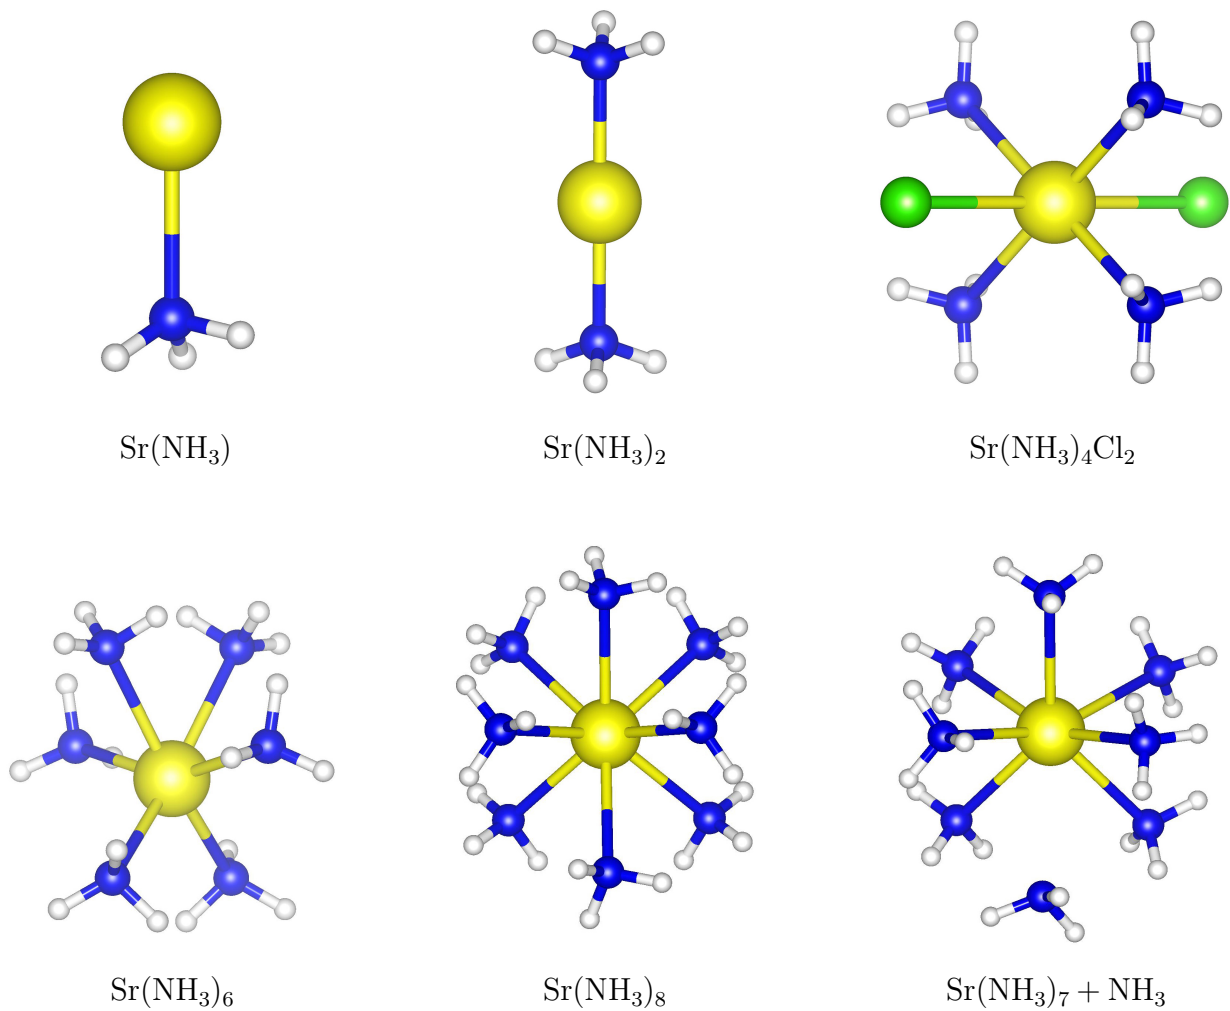

Figure S1: Different Sr coordinations used in the crystal structure prediction of each phase.

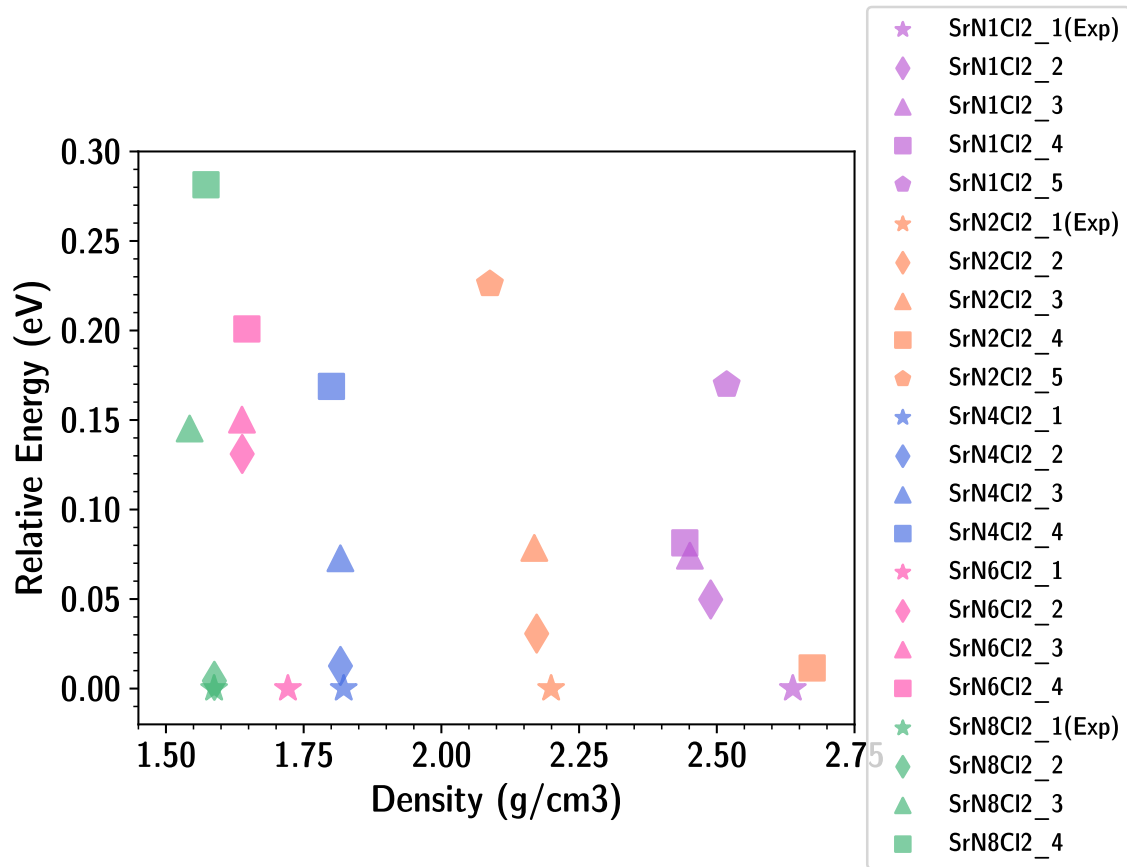

Figure S2: Relative energy-density relationships at PBEsol-D3 level of calculations for all considered predicted crystal structures.

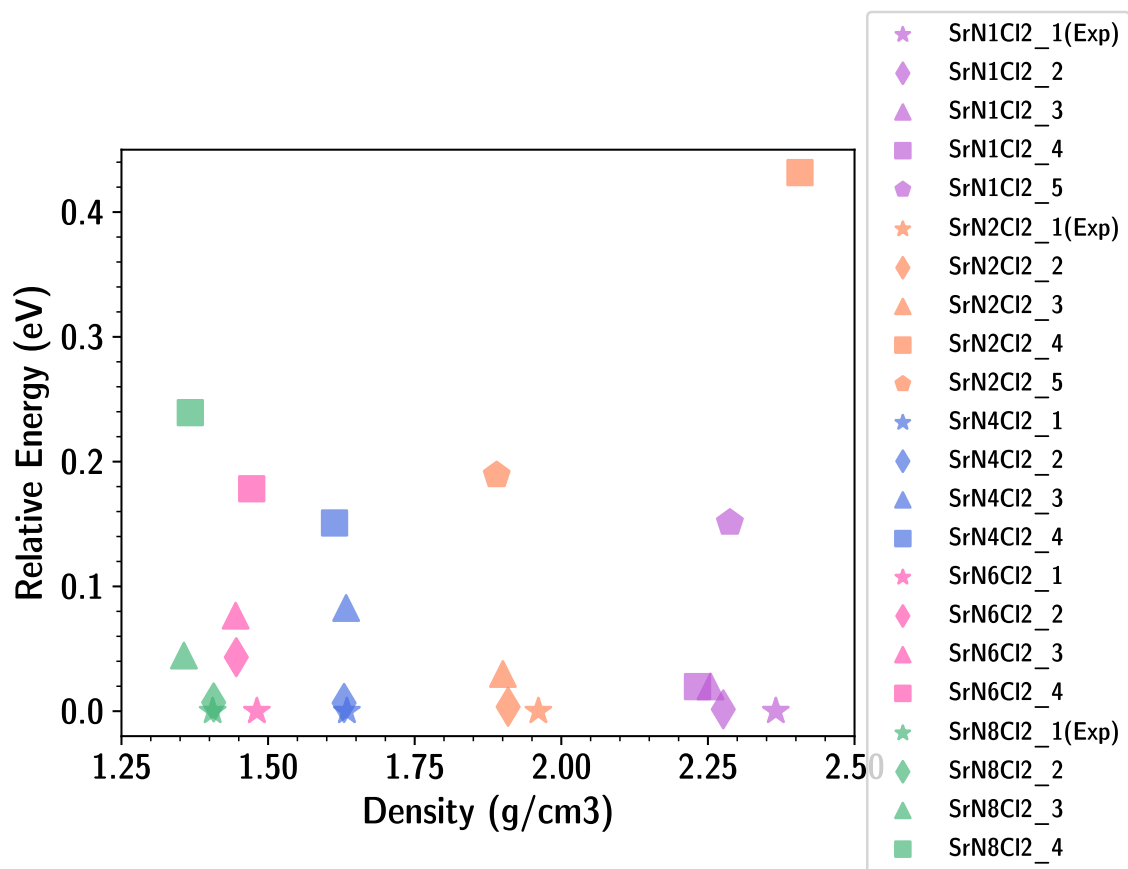

Figure S3: Relative energy-density relationships at PW91-D3 level of calculations for all considered predicted crystal structures.

Table S2: Crystallographic details, energy ranking and density of the stable octamine structures in the energy range up to 0.5 eV/f.u. above the global minimum calculated within the PBE-D3, PBESOL-D3 and PW91-D3 levels of theory.

| Structure Name                                 |            | PBE-D3  | PBESOL-D3 | PW91-D3 |
|------------------------------------------------|------------|---------|-----------|---------|
| SrN8Cl2.1(Exp)<br><i>P2<sub>1</sub>/c</i> (14) | a          | 7.3965  | 7.2305    | 7.5035  |
|                                                | b          | 14.9465 | 14.5719   | 15.1669 |
|                                                | c          | 11.9658 | 11.7064   | 12.2405 |
|                                                | $\beta$    | 90.09   | 90.09     | 90.23   |
|                                                | $\Delta E$ | 0.0     | 0.0       | 0.0     |
|                                                | $\rho$     | 1.4801  | 1.5874    | 1.4055  |
| SrN8Cl2.2<br><i>P2<sub>1</sub>/c</i> (14)      | a          | 7.4034  | 7.2366    | 7.5115  |
|                                                | b          | 11.9565 | 11.7049   | 12.2254 |
|                                                | c          | 16.6439 | 16.2241   | 16.8976 |
|                                                | $\beta$    | 116.25  | 116.21    | 116.28  |
|                                                | $\Delta E$ | 0.0061  | 0.0043    | 0.0070  |
|                                                | $\rho$     | 1.4818  | 1.5879    | 1.4072  |
| SrN8Cl2.3<br><i>P1</i> (1)                     | a          | 7.0317  | 6.8543    | 7.2685  |
|                                                | b          | 7.4214  | 7.2621    | 7.5648  |
|                                                | c          | 13.0369 | 12.7612   | 13.1321 |
|                                                | $\alpha$   | 89.45   | 89.40     | 89.39   |
|                                                | $\beta$    | 87.63   | 87.41     | 88.26   |
|                                                | $\gamma$   | 89.27   | 89.14     | 89.54   |
|                                                | $\Delta E$ | 0.1272  | 0.1452    | 0.0446  |
| $\rho$                                         | 1.4403     | 1.5430  | 1.3565    |         |
| SrN8Cl2.4<br><i>Pnn2</i> (34)                  | a          | 7.5032  | 7.3437    | 7.7484  |
|                                                | b          | 14.9764 | 14.8080   | 14.8303 |
|                                                | c          | 5.9410  | 5.7241    | 6.2300  |
|                                                | $\Delta E$ | 0.3011  | 0.2814    | 0.2392  |
|                                                | $\rho$     | 1.4664  | 1.5727    | 1.3674  |

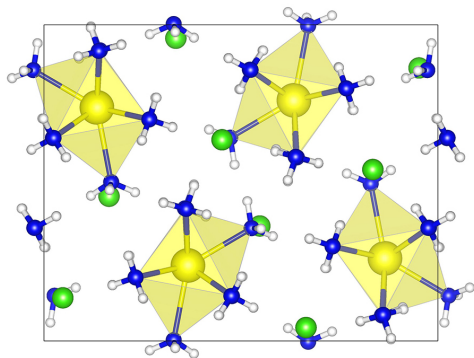

SrN8Cl2\_1(Exp)

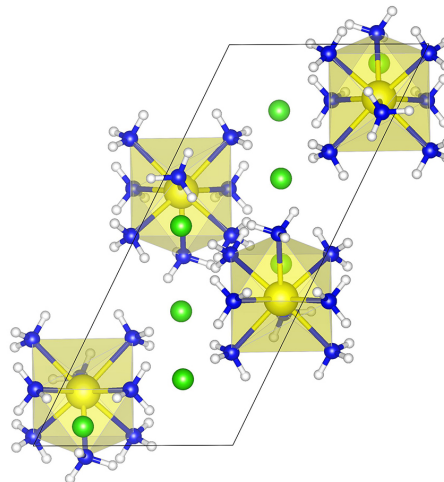

SrN8Cl2\_2

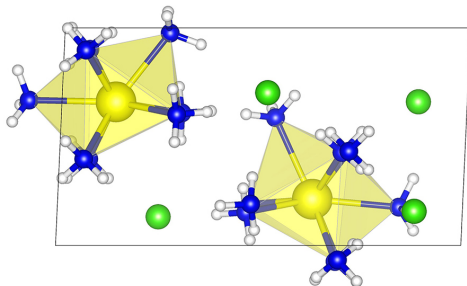

SrN8Cl2\_3

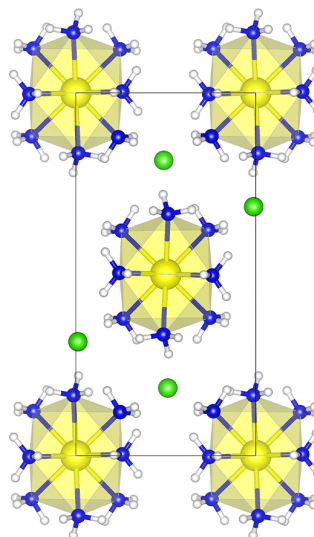

SrN8Cl2\_4

Figure S4: Stable octammine crystal structures found by FFCASP.

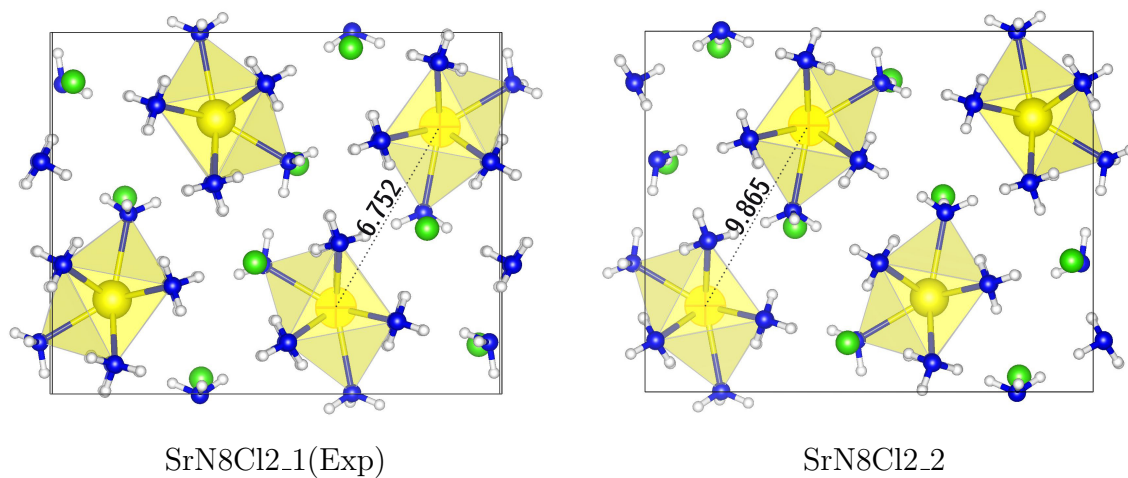

Figure S5: Structural details of two similar octammine structure.

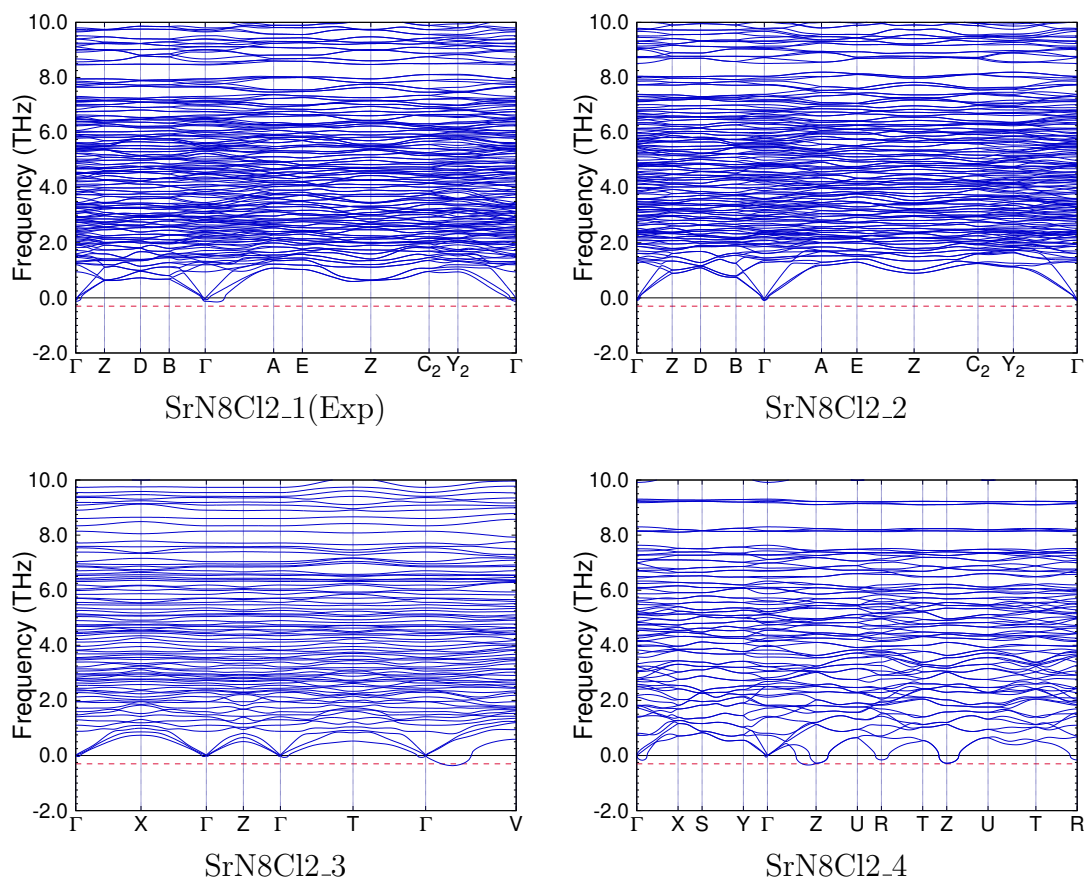

Figure S6: Phonon band diagrams of octammine structures. Dotted red lines indicate the low bounds within the errorbar of 0.3 THz.

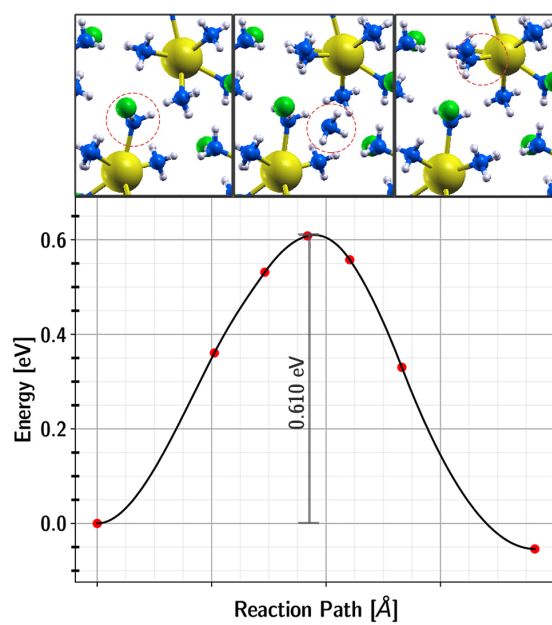

Figure S7: Bulk diffusion NH<sub>3</sub> in SrN<sub>8</sub>Cl<sub>12.1</sub>(Exp).

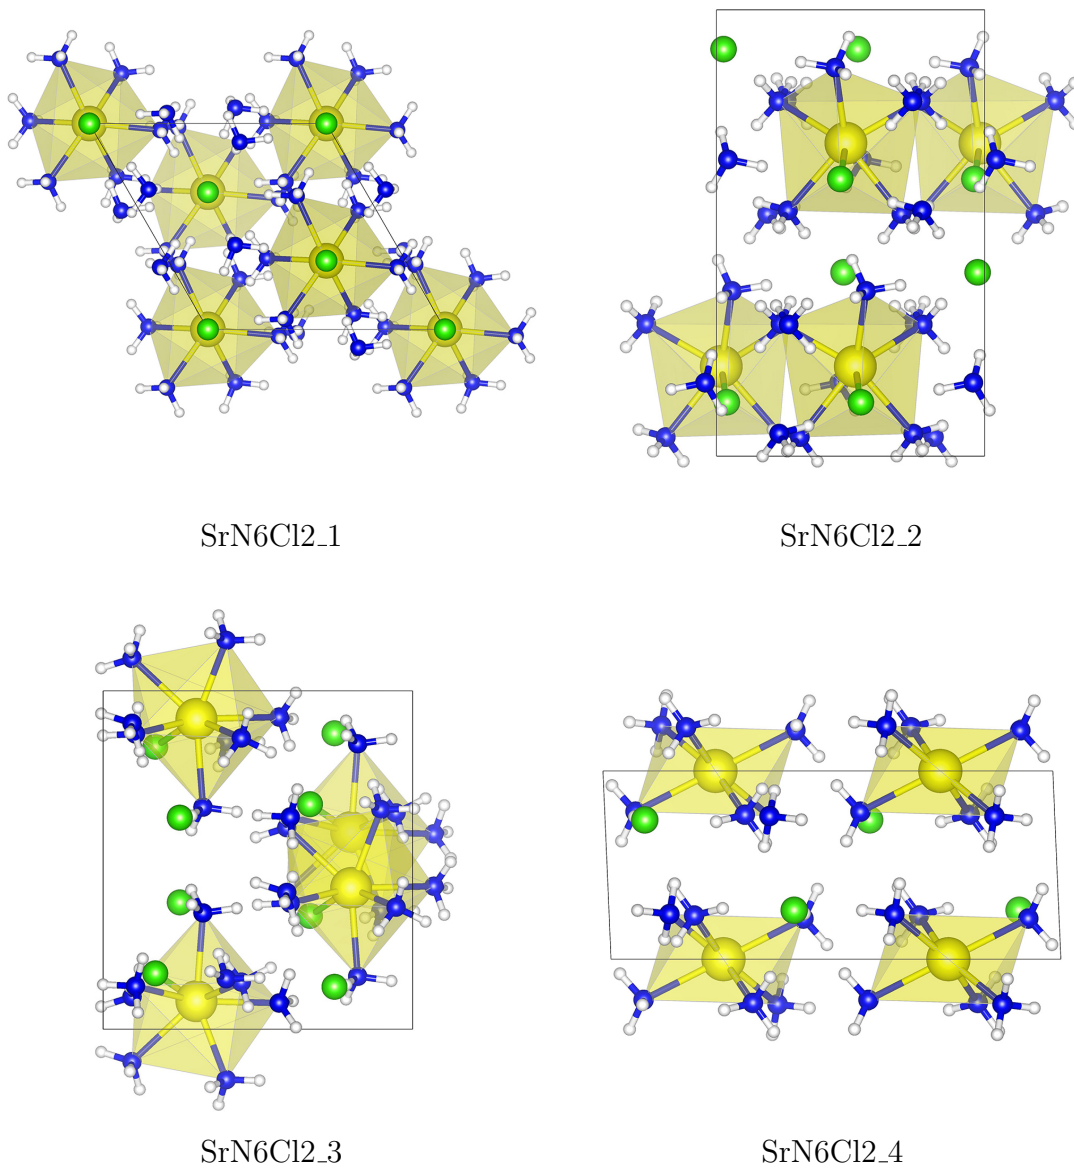

Figure S8: Stable hexammine crystal structures found by FFCASP.



Table S3: Crystallographic details, energy ranking and density of the stable hexamine structures in the energy range up to 0.5 eV/f.u. above the global minimum calculated within the PBE-D3, PBESOL-D3 and PW91-D3 levels of theory.

| Structure Name                |            | PBE-D3  | PBESOL-D3 | PW91-D3 |
|-------------------------------|------------|---------|-----------|---------|
| SrN6Cl2_1<br><i>R3</i> (146)  | a          | 8.6709  | 8.5267    | 8.7098  |
|                               | c          | 12.5336 | 11.9874   | 13.3595 |
|                               | $\gamma$   | 120.00  | 120.0     | 120.00  |
|                               | $\Delta E$ | 0.0     | 0.0       | 0.0     |
|                               | $\rho$     | 1.5927  | 1.7214    | 1.4809  |
| SrN6Cl2_2<br><i>Cc</i> (9)    | a          | 10.0404 | 9.8822    | 10.3062 |
|                               | b          | 8.1930  | 8.0150    | 8.3643  |
|                               | c          | 13.8151 | 13.4562   | 14.0916 |
|                               | $\beta$    | 97.57   | 97.30     | 99.36   |
|                               | $\Delta E$ | 0.1083  | 0.1310    | 0.0433  |
| SrN6Cl2_3<br><i>Cc</i> (9)    | $\rho$     | 1.5389  | 1.6384    | 1.4458  |
|                               | a          | 10.9664 | 10.7874   | 11.1949 |
|                               | b          | 10.4937 | 10.3313   | 10.7203 |
|                               | c          | 11.2010 | 10.8456   | 11.4177 |
|                               | $\beta$    | 119.19  | 119.03    | 119.06  |
| SrN6Cl2_4<br><i>P2/c</i> (13) | $\Delta E$ | 0.1302  | 0.1502    | 0.0765  |
|                               | $\rho$     | 1.5371  | 1.6380    | 1.4447  |
|                               | a          | 5.6002  | 5.4599    | 5.6811  |
|                               | b          | 7.5100  | 7.4020    | 7.6934  |
|                               | c          | 13.2439 | 13.0202   | 13.4607 |
| SrN6Cl2_4<br><i>P2/c</i> (13) | $\beta$    | 92.22   | 92.44     | 91.38   |
|                               | $\Delta E$ | 0.1940  | 0.2009    | 0.1783  |
|                               | $\rho$     | 1.5556  | 1.6469    | 1.4721  |

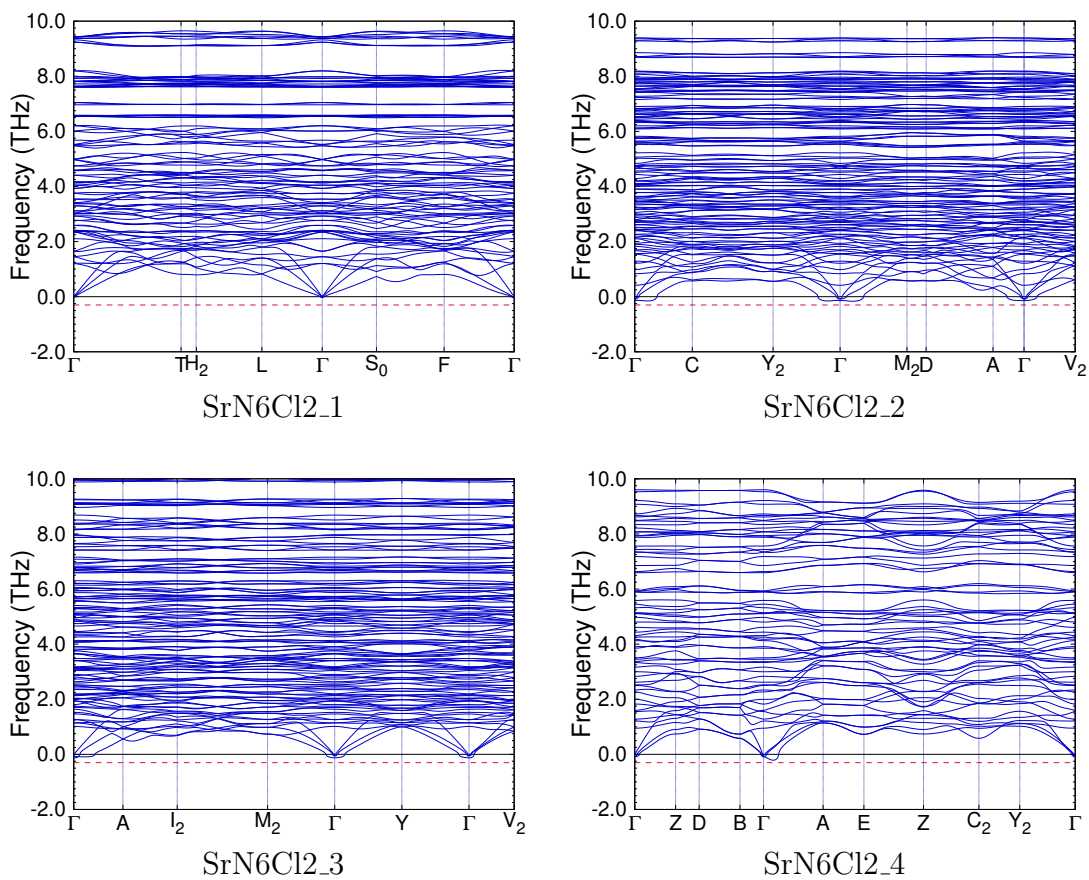

Figure S9: Phonon band diagrams of hexamine structures. Dotted red lines indicate the low bounds within the errorbar of 0.3 THz.

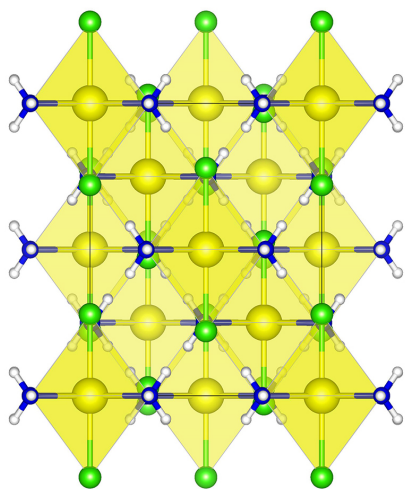

SrN4Cl2\_1

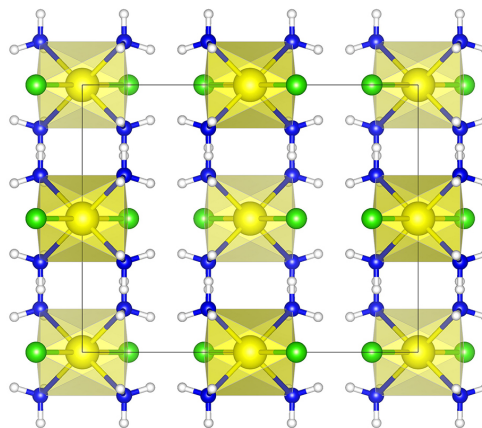

SrN4Cl2\_2

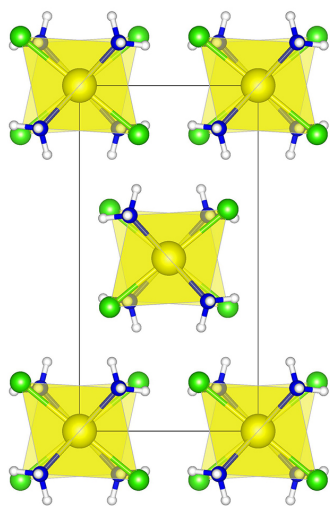

SrN4Cl2\_3

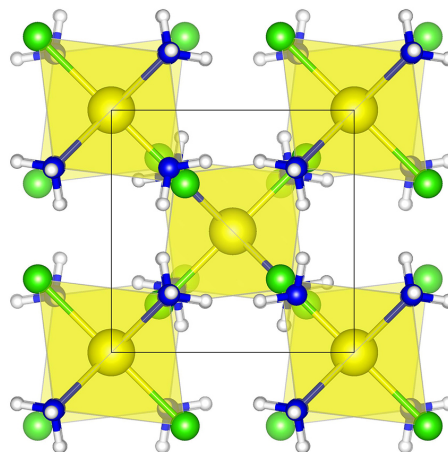

SrN4Cl2\_4

Figure S10: Stable tetrammine crystal structures found by FFCASP.

Table S4: Crystallographic details, energy ranking and density of the stable tetramine structures in the energy range up to 0.5 eV/f.u. above the global minimum calculated within the PBE-D3, PBESOL-D3 and PW91-D3 levels of theory.

| Structure Name                    |            | PBE-D3  | PBESOL-D3 | PW91-D3 |
|-----------------------------------|------------|---------|-----------|---------|
| SrN4Cl2_1<br><i>Fddd</i> (70)     | a          | 8.2846  | 8.0922    | 8.5050  |
|                                   | b          | 10.3188 | 10.2239   | 10.4692 |
|                                   | c          | 20.5038 | 19.9657   | 20.6889 |
|                                   | $\Delta E$ | 0.0     | 0.0       | 0.0     |
|                                   | $\rho$     | 1.7177  | 1.8227    | 1.6344  |
| SrN4Cl2_2<br><i>Cmce</i> (64)     | a          | 10.2606 | 10.0032   | 10.3555 |
|                                   | b          | 6.6760  | 6.5978    | 6.8017  |
|                                   | c          | 12.8366 | 12.5547   | 13.1156 |
|                                   | $\Delta E$ | 0.0105  | 0.0126    | 0.0066  |
|                                   | $\rho$     | 1.7120  | 1.8168    | 1.6296  |
| SrN4Cl2_3<br><i>Ibam</i> (72)     | a          | 6.6385  | 6.5667    | 6.7326  |
|                                   | b          | 12.9623 | 12.7381   | 13.2248 |
|                                   | c          | 10.2169 | 9.9064    | 10.3529 |
|                                   | $\Delta E$ | 0.0802  | 0.0728    | 0.0827  |
|                                   | $\rho$     | 1.7123  | 1.8167    | 1.6331  |
| SrN4Cl2_4<br><i>I - 42m</i> (121) | a          | 6.6279  | 6.5164    | 6.7551  |
|                                   | c          | 20.2231 | 19.6910   | 20.4491 |
|                                   | $\Delta E$ | 0.1546  | 0.1688    | 0.1508  |
|                                   | $\rho$     | 1.6946  | 1.8004    | 1.6133  |

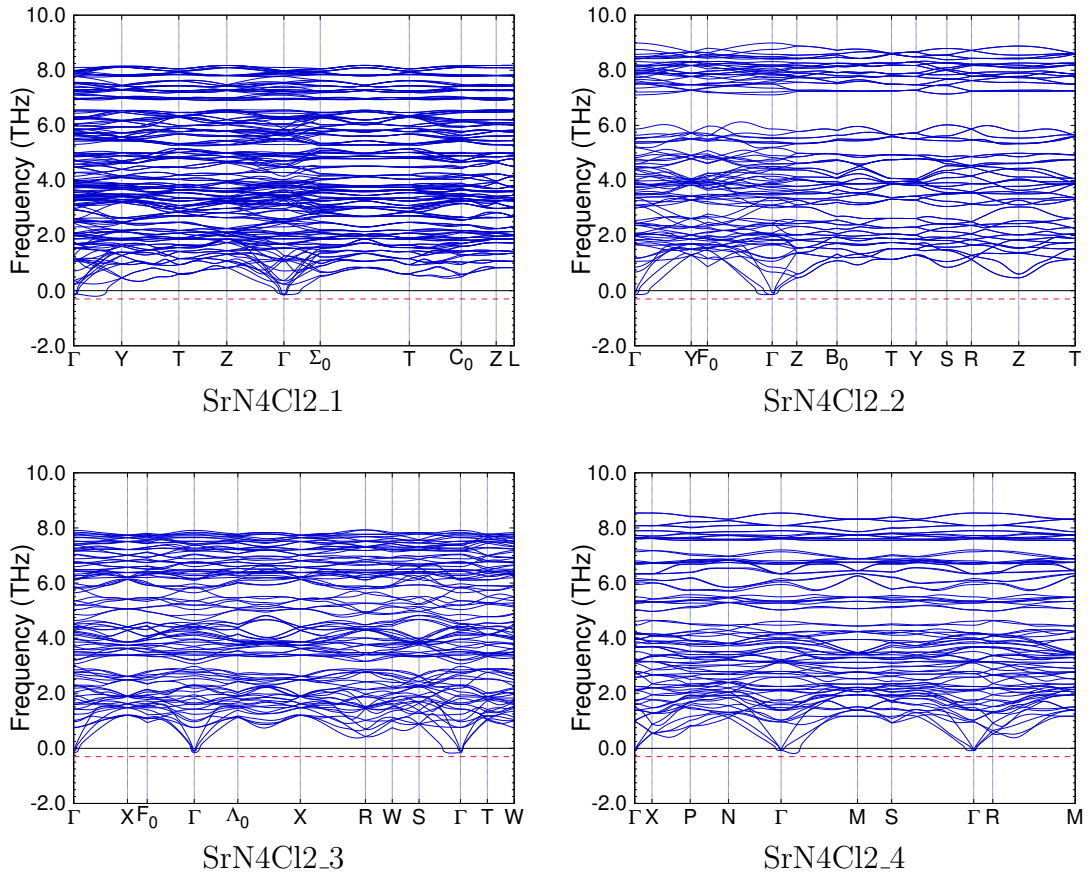

Figure S11: Phonon band diagrams of tetrammine structures. Dotted red lines indicate the low bounds within the errorbar of 0.3 THz.

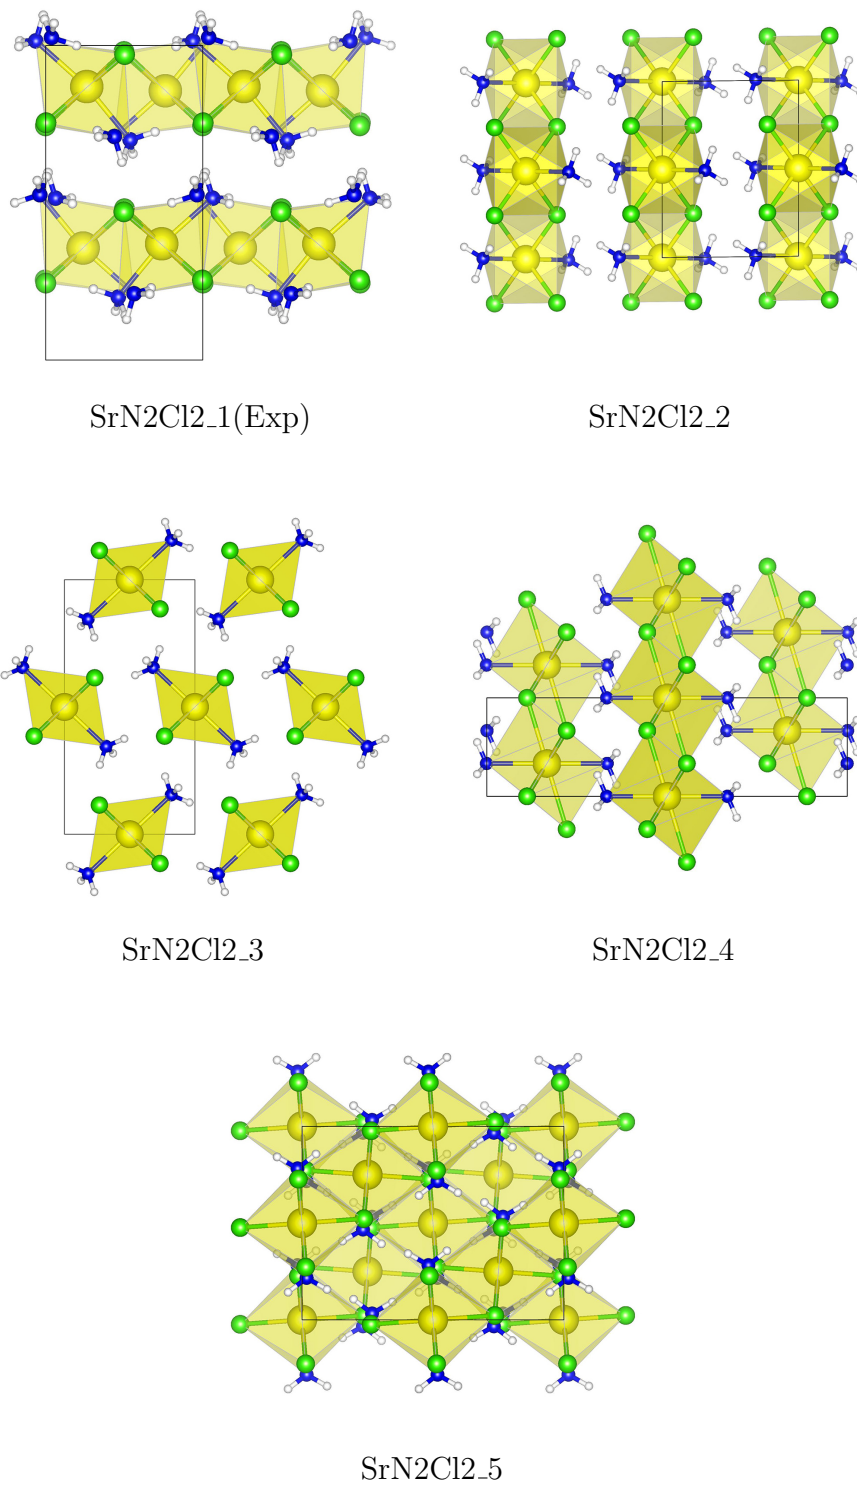

Figure S12: Experimental and the predicted stable diammine crystal structures found by FFCASP.

Table S5: Crystallographic details, energy ranking and density of the stable diamine structures in the energy range up to 0.5 eV/f.u. above the global minimum calculated within the PBE-D3, PBESOL-D3 and PW91-D3 levels of theory.

| Structure Name                                            |                                               | PBE-D3  | PBESOL-D3 | PW91-D3 |
|-----------------------------------------------------------|-----------------------------------------------|---------|-----------|---------|
| SrN2Cl2_1(Exp)<br><i>Pc</i> (7)<br>( $Z' = 4$ )           | a                                             | 8.1659  | 8.0647    | 8.2727  |
|                                                           | b                                             | 6.1329  | 5.9964    | 12.7401 |
|                                                           | c                                             | 12.3484 | 12.0279   | 20.6889 |
|                                                           | $\beta$                                       | 90.09   | 90.39     | 91.40   |
|                                                           | $\Delta E$                                    | 0.0     | 0.0       | 0.0     |
|                                                           | $\rho$                                        | 2.0684  | 2.1992    | 1.9609  |
| SrN2Cl2_2<br><i>P2<sub>1</sub>/c</i> (14)<br>( $Z' = 2$ ) | a                                             | 6.2674  | 6.1387    | 6.5874  |
|                                                           | b                                             | 6.1704  | 6.0495    | 6.1588  |
|                                                           | c                                             | 8.0809  | 7.9261    | 8.2997  |
|                                                           | $\beta$                                       | 90.95   | 90.64     | 95.83   |
|                                                           | $\Delta E$                                    | 0.0246  | 0.0307    | 0.0035  |
|                                                           | $\rho$                                        | 2.0469  | 2.1730    | 1.9093  |
| SrN2Cl2_3<br><i>P2<sub>1</sub>/c</i> (14)<br>( $Z' = 2$ ) | a                                             | 4.2864  | 4.2285    | 4.3213  |
|                                                           | b                                             | 6.1099  | 5.9783    | 6.2063  |
|                                                           | c                                             | 11.9890 | 11.6666   | 12.5683 |
|                                                           | $\beta$                                       | 90.28   | 90.40     | 93.21   |
|                                                           | $\Delta E$                                    | 0.0782  | 0.0786    | 0.0298  |
|                                                           | $\rho$                                        | 2.0370  | 2.1687    | 1.9004  |
| SrN2Cl2_4<br><i>R - 3m</i> (166)<br>( $Z' = 3$ )          | a                                             | 5.1809  | 5.0739    | 5.2174  |
|                                                           | c                                             | 16.5299 | 16.0912   | 16.9070 |
|                                                           | $\gamma$                                      | 120.00  | 120.00    | 120.00  |
|                                                           | $\Delta E$                                    | 0.2363  | 0.0098    | 0.4317  |
|                                                           | $\rho$                                        | 2.4967  | 2.6741    | 2.4070  |
|                                                           | SrN2Cl2_5<br><i>Fdd2</i> (43)<br>( $Z' = 2$ ) | a       | 8.3870    | 8.2161  |
| b                                                         |                                               | 11.3899 | 11.1249   | 11.4762 |
| c                                                         |                                               | 13.5673 | 13.4044   | 13.7301 |
| $\Delta E$                                                |                                               | 0.2634  | 0.2259    | 0.1892  |
| $\rho$                                                    |                                               | 1.9739  | 2.0881    | 1.8898  |

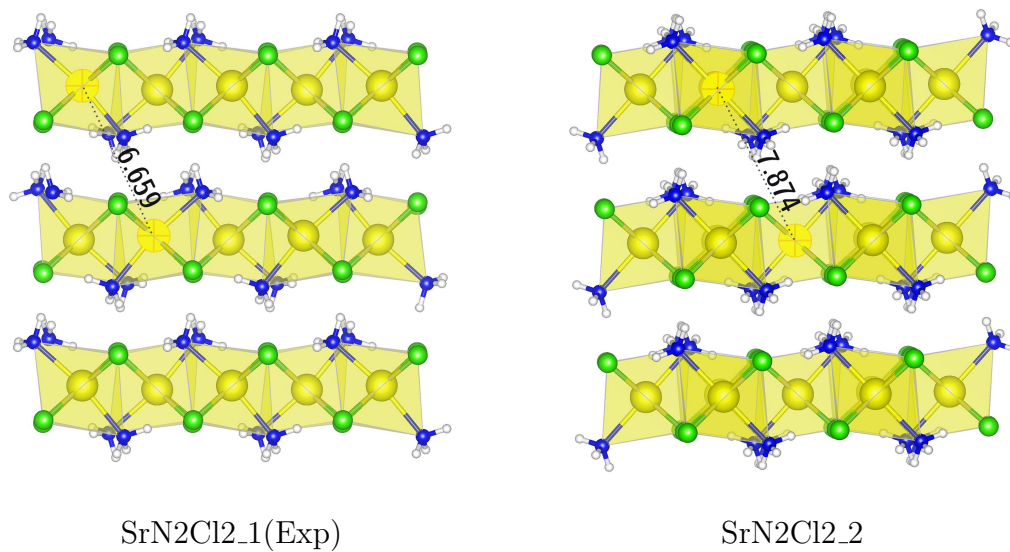

Figure S13: Structural differences between SrN<sub>2</sub>Cl<sub>2.1</sub>(Exp) and SrN<sub>2</sub>Cl<sub>2.2</sub>.



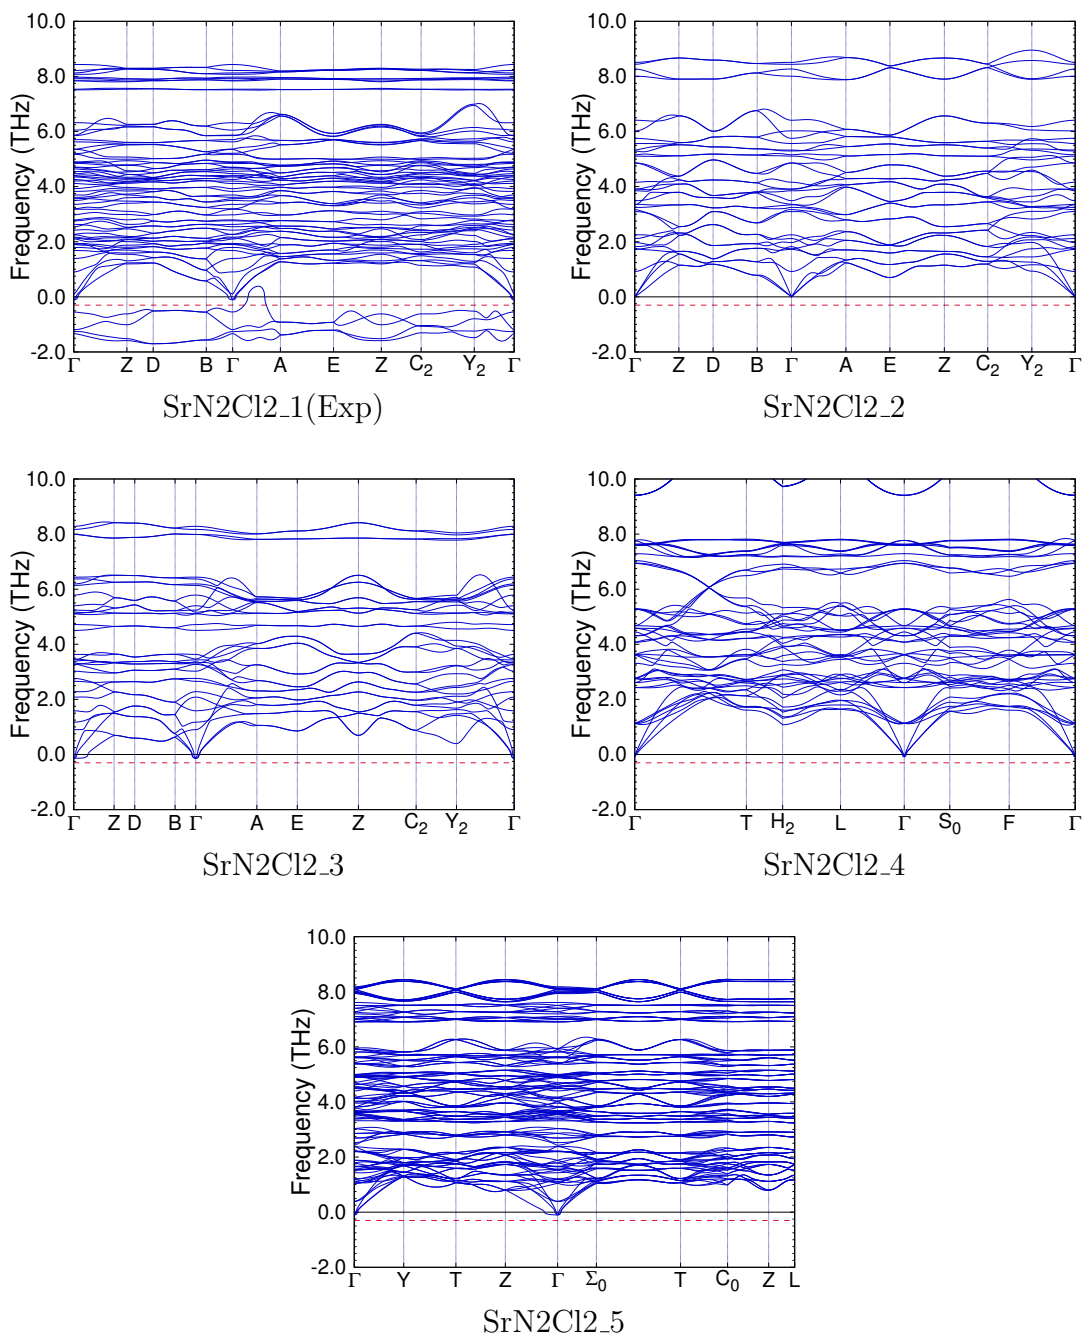

Figure S14: Phonon band diagrams of diammine structures. Dotted red lines indicate the low bounds within the errorbar of 0.3 THz.

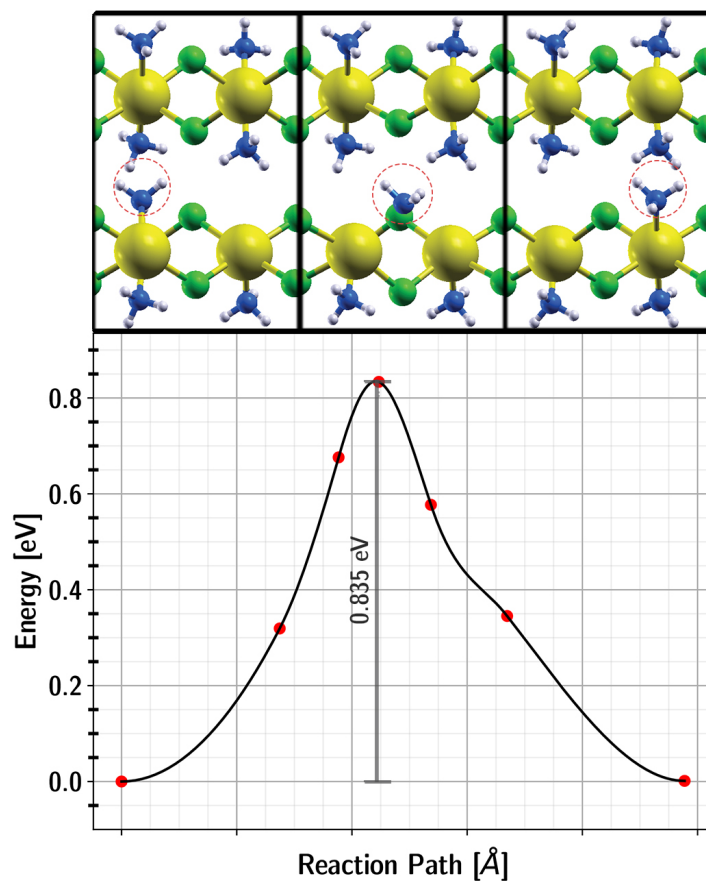

Figure S15: Bulk diffusion of NH<sub>3</sub> in SrN<sub>2</sub>Cl<sub>2</sub>.1(Exp).

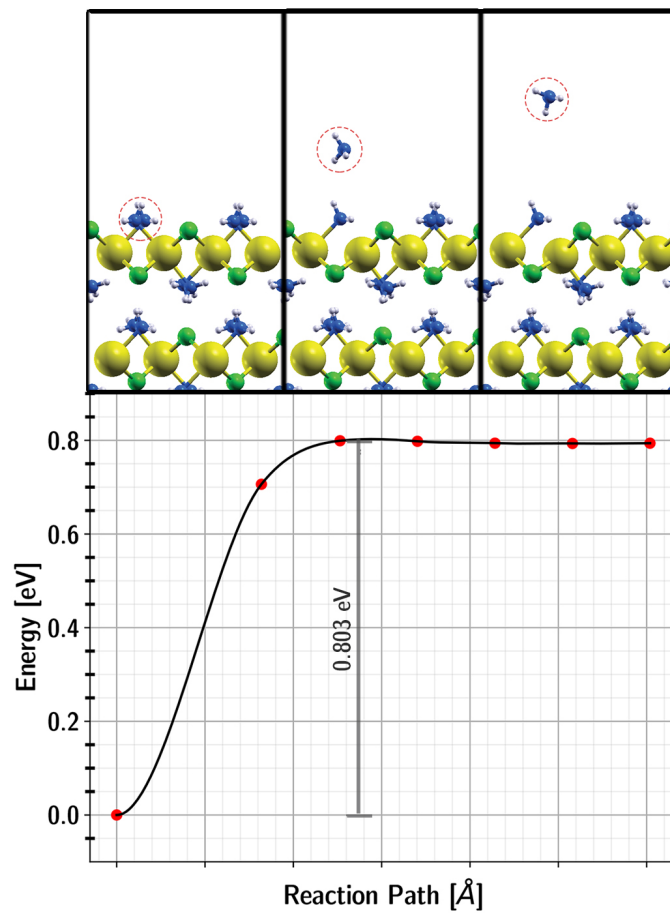

Figure S16: Surface diffusion of NH<sub>3</sub> in SrN<sub>2</sub>Cl<sub>2</sub>\_1(Exp).

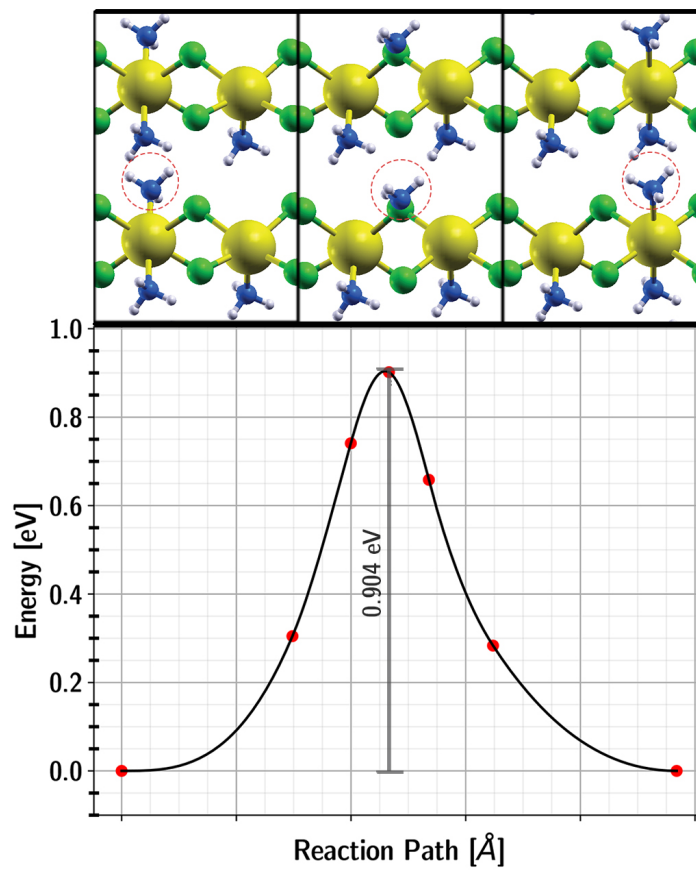

Figure S17: Bulk diffusion of  $\text{NH}_3$  in  $\text{SrN}_2\text{Cl}_{2.2}$ .

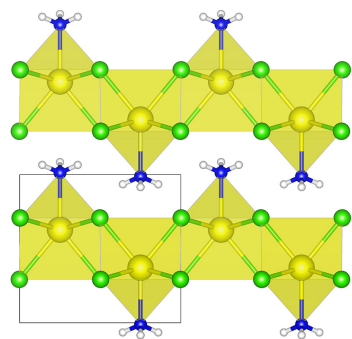

SrN1Cl2\_1(Exp)

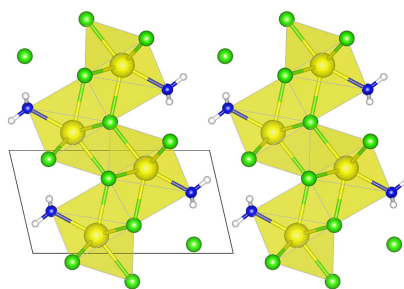

SrN1Cl2\_2

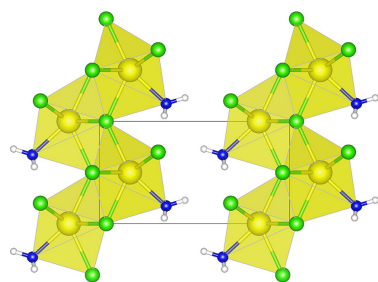

SrN1Cl2\_3

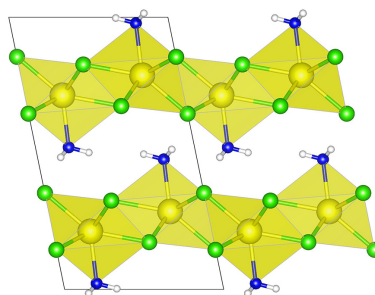

SrN1Cl2\_4

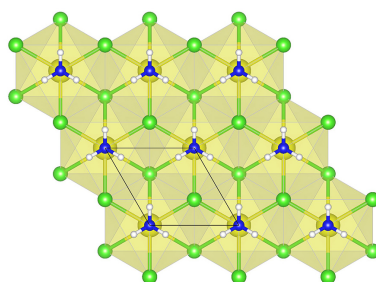

SrN1Cl2\_5

Figure S18: Stable monoammine crystal structures found by FFCASP.

Table S6: Crystallographic details, energy ranking and density of the stable monoamine structures in the energy range up to 0.5 eV/f.u. above the global minimum calculated within the PBE-D3, PBESOL-D3 and PW91-D3 levels of theory.

| Structure Name                                                     |            | PBE-D3  | PBESOL-D3 | PW91-D3 |
|--------------------------------------------------------------------|------------|---------|-----------|---------|
| SrN1Cl2_1(Exp)<br><i>P2<sub>1</sub>/m</i> (11)<br>( <i>Z'</i> = 2) | a          | 4.5085  | 4.4399    | 4.5372  |
|                                                                    | b          | 7.5008  | 7.3576    | 7.5733  |
|                                                                    | c          | 7.3001  | 7.1227    | 7.4676  |
|                                                                    | $\beta$    | 107.78  | 108.23    | 106.17  |
|                                                                    | $\Delta E$ | 0.0     | 0.0       | 0.0     |
|                                                                    | $\rho$     | 2.4802  | 2.638     | 2.3658  |
| SrN1Cl2_2<br><i>P2<sub>1</sub>/m</i> (11)<br>( <i>Z'</i> = 2)      | a          | 5.4404  | 5.3491    | 5.5129  |
|                                                                    | b          | 4.5055  | 4.4378    | 4.5394  |
|                                                                    | c          | 10.3480 | 10.1257   | 10.5550 |
|                                                                    | $\beta$    | 102.84  | 102.95    | 104.14  |
|                                                                    | $\Delta E$ | 0.0489  | 0.0497    | 0.0015  |
|                                                                    | $\rho$     | 2.3575  | 2.4889    | 2.2762  |
| SrN1Cl2_3<br><i>Pmn2<sub>1</sub></i> (31)<br>( <i>Z'</i> = 2)      | a          | 4.4989  | 4.4363    | 4.5316  |
|                                                                    | b          | 10.2256 | 9.9727    | 10.3336 |
|                                                                    | c          | 5.4601  | 5.3764    | 5.5225  |
|                                                                    | $\Delta E$ | 0.0768  | 0.0742    | 0.0198  |
| SrN1Cl2_4<br><i>C2/m</i> (12)<br>( <i>Z'</i> = 4)                  | $\rho$     | 2.3211  | 2.4511    | 2.2545  |
|                                                                    | a          | 14.0847 | 13.7799   | 14.4199 |
|                                                                    | b          | 4.5442  | 4.4921    | 4.5790  |
|                                                                    | c          | 8.0654  | 7.8744    | 8.0800  |
|                                                                    | $\beta$    | 101.51  | 101.58    | 101.73  |
|                                                                    | $\Delta E$ | 0.0814  | 0.0814    | 0.0197  |
| SrN1Cl2_5<br><i>P3m1</i> (156)<br>( <i>Z'</i> = 1)                 | $\rho$     | 2.3052  | 2.4419    | 2.3222  |
|                                                                    | a          | 4.7587  | 4.6970    | 4.7788  |
|                                                                    | c          | 6.2656  | 6.0595    | 6.4437  |
|                                                                    | $\gamma$   | 120.00  | 120.00    | 120.00  |
|                                                                    | $\Delta E$ | 0.1867  | 0.1697    | 0.1511  |
|                                                                    | $\rho$     | 2.3052  | 2.5179    | 2.2875  |

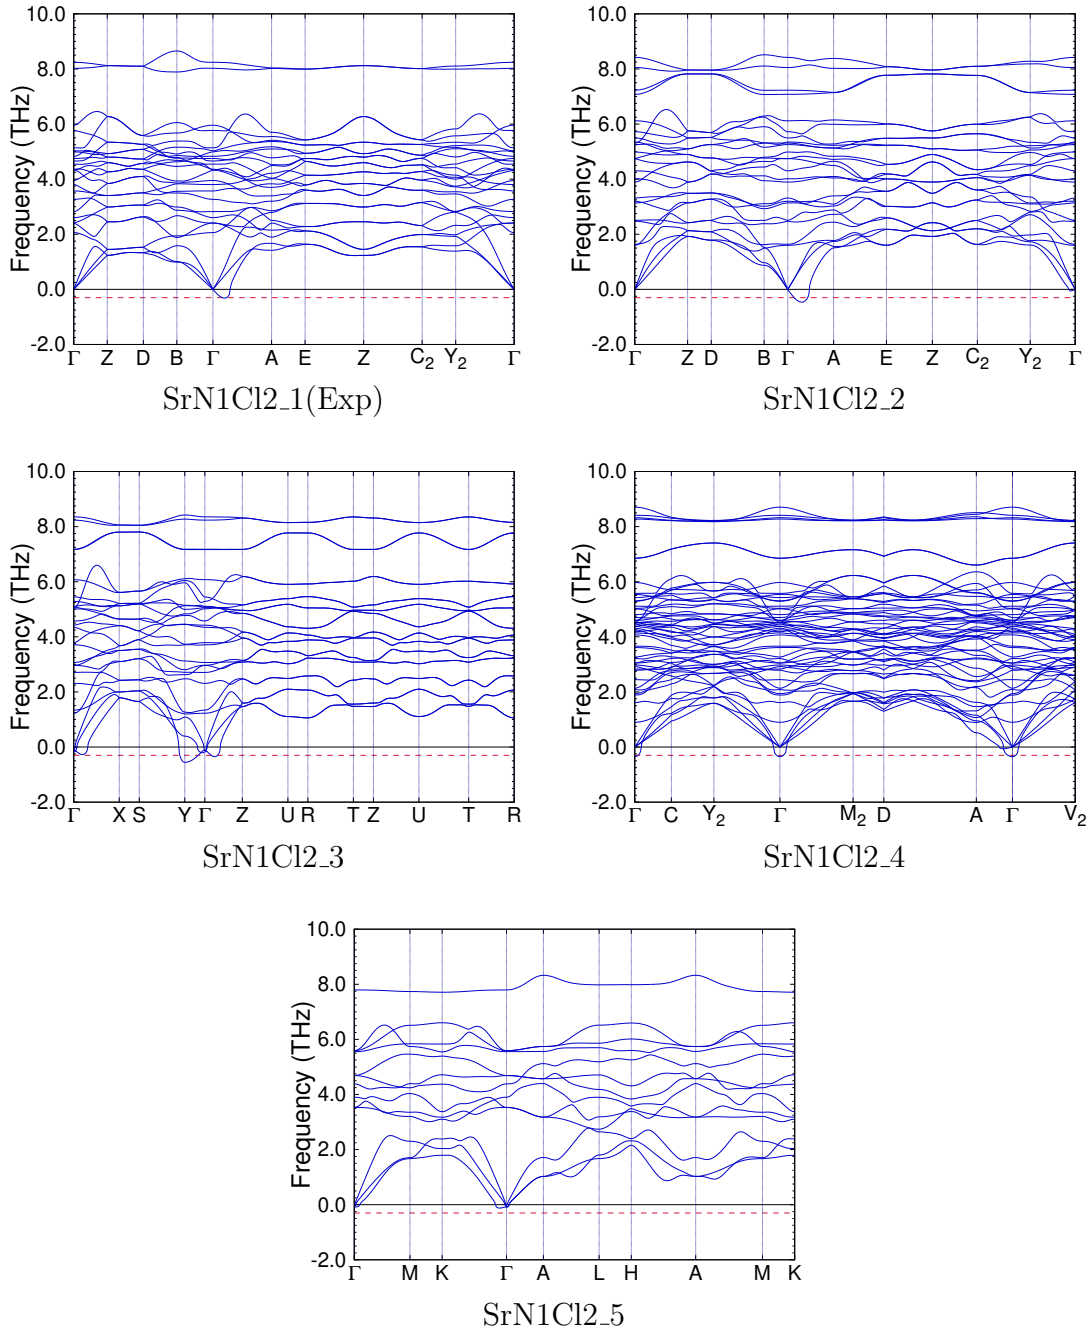

Figure S19: Phonon band diagrams of monoammine structures. Dotted red lines indicate the low bounds within the error bar of 0.3 THz.

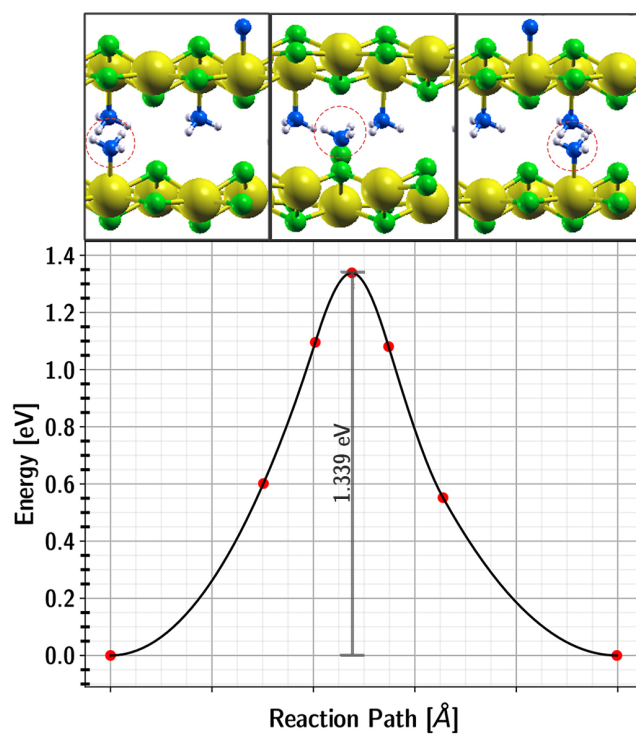

Figure S20: Bulk diffusion of  $\text{NH}_3$  in  $\text{SrN1Cl2.1(Exp)}$ .

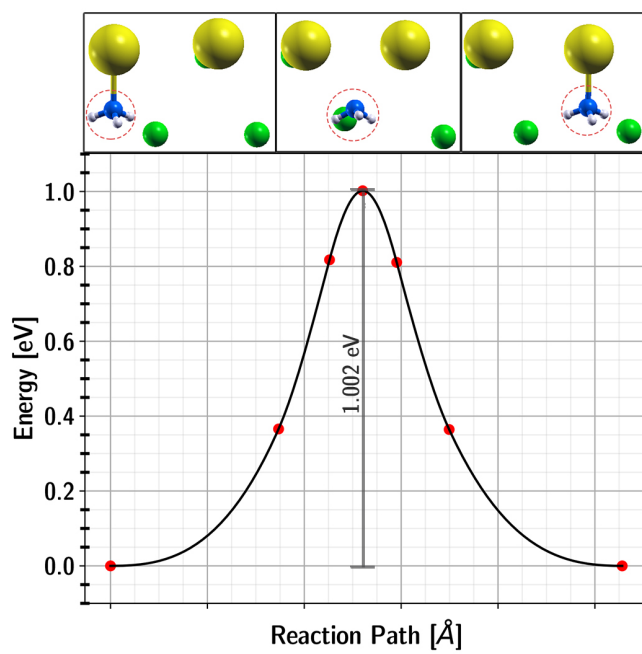

Figure S21: Bulk diffusion of  $\text{NH}_3$  in  $\text{SrN1Cl2.2}$ .
